# Supplementary material for: Highly sensitive and selective fiber-optic modal interferometric sensor for detecting trace mercury ion in aqueous solution
Source: Royal Society of Chemistry journal article supplement (doi:10.1039/c2ay05791c), 2012-01-01
Supplement: c2ay05791c.pdf [file c2ay05791c.pdf]

1 **Highly sensitive and selective fiber-optic modal**  
2 **interferometric sensor for detecting trace mercury ion in**  
3 **aqueous solution**

4  
5 Mingjie Yin<sup>a</sup>, Bobo Gu<sup>b</sup>, Jinwen Qian<sup>a\*</sup>, A. Ping Zhang<sup>b</sup>, Quanfu An<sup>a</sup>,  
6 and Sailing He<sup>b,c</sup>

7 <sup>a</sup>MOE Key Laboratory of Macromolecular Synthesis and Functionalization,  
8 Department of Polymer Science & Engineering, Zhejiang University, Hangzhou  
9 310027, China

10 <sup>b</sup>Center for Optical and Electromagnetic Research, State Key Laboratory of Modern  
11 Optical Instrumentation, Zhejiang University, Hangzhou 310058, China

12 <sup>c</sup>Division of Electromagnetic Engineering, School of Electrical Engineering, Royal Institute of  
13 Technology, S-100 44 Stockholm, Sweden

14  
15  
16  
17  
18  
19  
20  
21  
22  
23  
24

---

\*Corresponding author: J.-W. Qian: Tel: +86-571-87953780; E-mail:  
[qianjw@zju.edu.cn](mailto:qianjw@zju.edu.cn)

1  
2  
3  
4  
5  
6

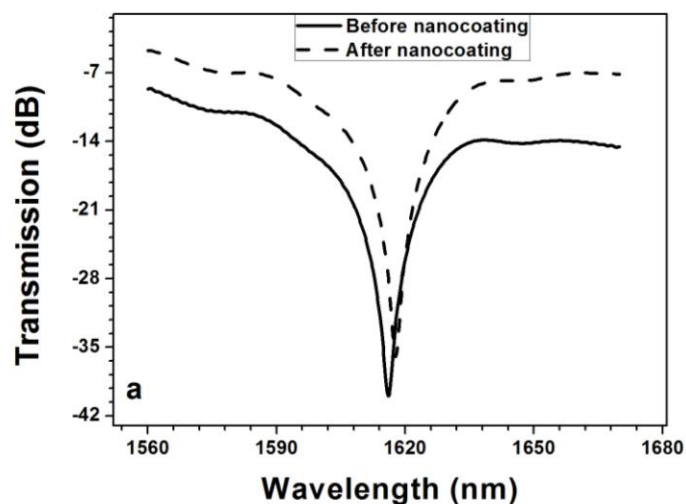

7

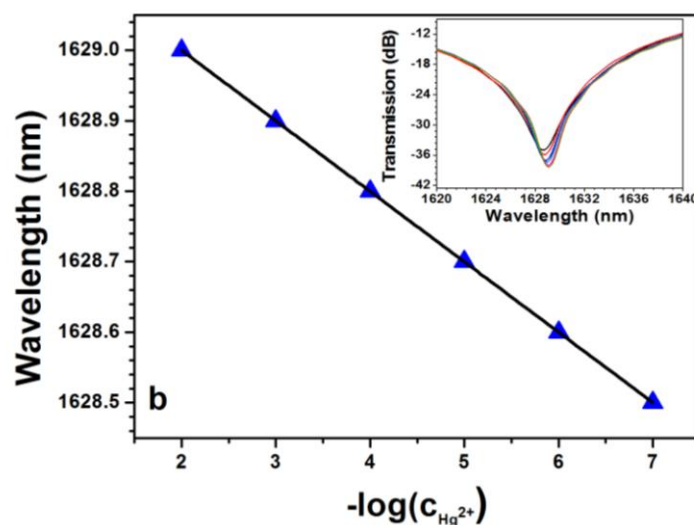

8

9 **Fig. S1.** The performance of TCFMI mercury ion sensor tested at pH=1 HgCl<sub>2</sub>  
10 solutions: a) Spectrum of TCFMI before (solid line) and after (dashed line) the  
11 deposition of (P4VP·HCl /PSS)<sub>10</sub> multilayers; b) The response of the fabricated  
12 TCFMI mercury sensor to different HgCl<sub>2</sub> solution concentration. The inset shows the  
13 measured spectra.

14

1  
2  
3  
4  
5

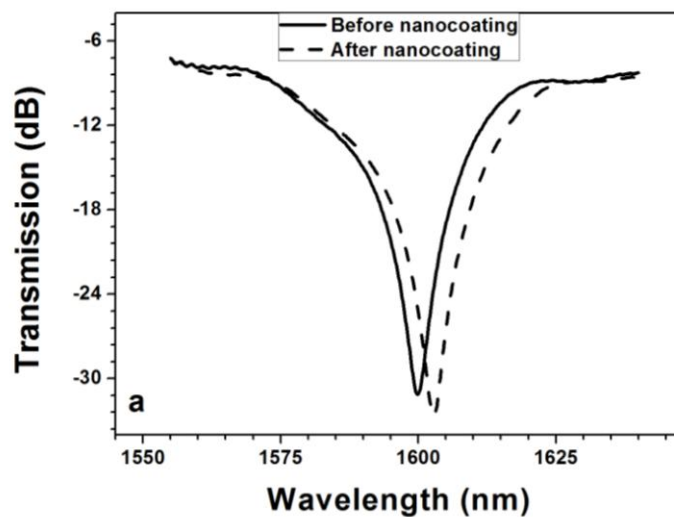

6  
7

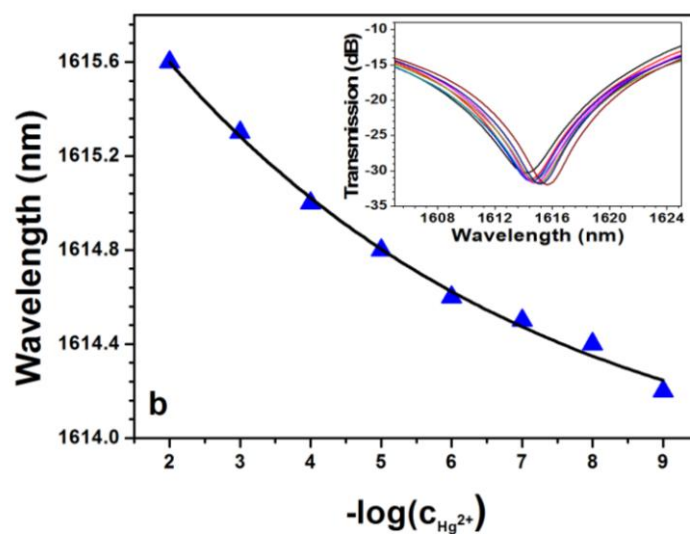

8  
9

10 **Fig. S2.** The performance of TCFMI mercury ion sensor tested at pH=3 HgCl<sub>2</sub>  
11 solutions: a) Spectrum of TCFMI before (solid line) and after (dashed line) the  
12 deposition of (P4VP·HCl /PSS)<sub>10</sub> multilayers; b) The response of the fabricated  
13 TCFMI mercury sensor to different HgCl<sub>2</sub> solution concentration. The inset shows the  
14 measured spectra.

1

2

3

4

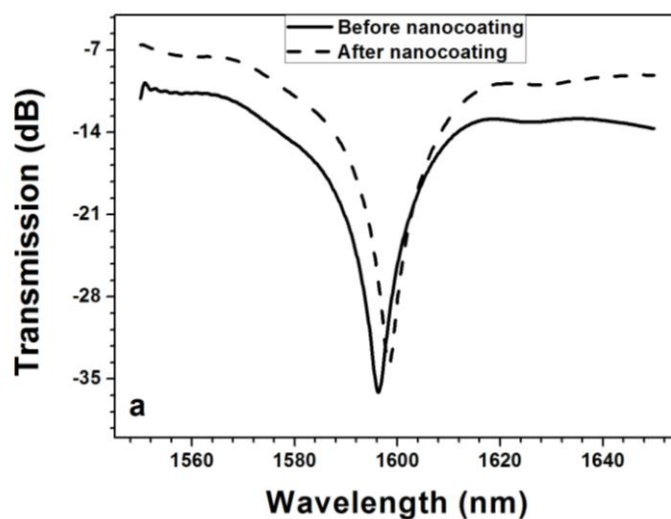

5

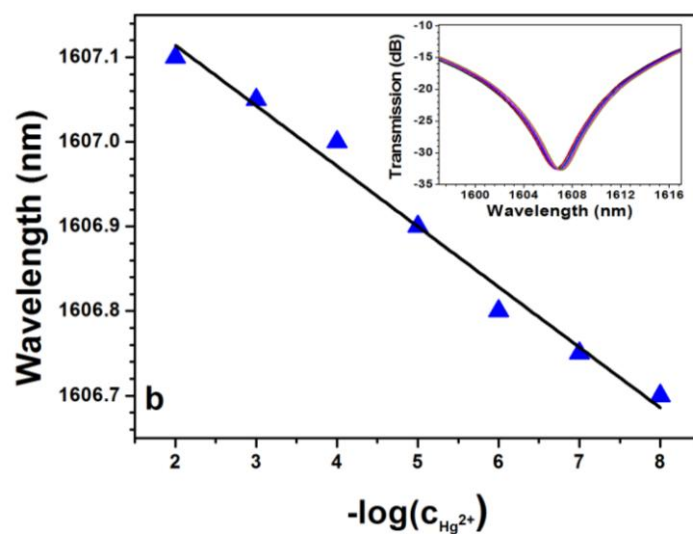

6

7 **Fig. S3.** The performance of TCFMI mercury ion sensor tested at pH=8  $\text{HgCl}_2$

8 solutions: a) Spectrum of TCFMI before (solid line) and after (dashed line) the

9 deposition of  $(\text{P4VP}\cdot\text{HCl} / \text{PSS})_{10}$  multilayers; b) The response of the fabricated

10 TCFMI mercury sensor to different  $\text{HgCl}_2$  solution concentration. The inset shows the

11 measured spectra.

12

13
